# Supplementary material
Source: publisher figshare collection journal article supplement (https://gsapubs.figshare.com/ndownloader/files/23303399)
Supplement: Supplementary file 1 [file 23303399]

## Sheet: Sheet1
Table DR1. Bedform data compilation.
This file is an ancillary file to "What Sets the Size of Current Ripples" by Mathieu G.A. Lapotre, Michael P. Lamb, and Brendon McElroy
#	Grain size, D (m)	Sediment reduced density, R	Fluid kinematic viscosity, ν (m2/s)	Shear velocity, u* (m/s)	Bedform wavelength, λ (m)	Shields stress, τ*	Particle Reynolds number, Rep	Yalin number, χ	Dimensionless wavelength, λ*	Reference	Notes
1	0.00018	1.65	9.99998e-07	0.0277753	0.13274	0.264783	4.99955	2.57263	3686.89	Barton and Lin, 1955	*
2	0.00018	1.65	9.99998e-07	0.0387273	0.144301	0.514764	6.97092	5.00143	5588.4	Barton and Lin, 1955	*
3	0.00018	1.65	9.99998e-07	0.0373419	0.159808	0.478594	6.72156	4.65001	5967.55	Barton and Lin, 1955	*
4	0.00018	1.65	9.99998e-07	0.0411825	0.151505	0.582104	7.41287	5.6557	6239.37	Barton and Lin, 1955	*
5	0.00018	1.65	9.99998e-07	0.0427104	0.147688	0.626096	7.68788	6.08313	6307.81	Barton and Lin, 1955	*
6	0.00018	1.65	9.99998e-07	0.0440937	0.179879	0.667309	7.93687	6.48355	7931.53	Barton and Lin, 1955	*
7	0.00018	1.65	9.99998e-07	0.0410889	0.191506	0.579459	7.39601	5.63001	7868.77	Barton and Lin, 1955	*
8	0.00018	1.65	9.99998e-07	0.0397999	0.204833	0.543674	7.16399	5.28231	8152.34	Barton and Lin, 1955	*
9	0.00018	1.65	9.99998e-07	0.0413705	0.211594	0.58743	7.4467	5.70745	8753.77	Barton and Lin, 1955	*
10	0.00018	1.65	9.99998e-07	0.0428077	0.212086	0.628953	7.7054	6.11089	9078.93	Barton and Lin, 1955	*
11	0.00018	1.65	9.99998e-07	0.0431011	0.204833	0.637605	7.75821	6.19494	8828.54	Barton and Lin, 1955	*
12	0.00018	1.65	9.99998e-07	0.0440937	0.208186	0.667309	7.93687	6.48355	9179.7	Barton and Lin, 1955	*
13	0.00018	1.65	9.99998e-07	0.0478598	0.202001	0.78617	8.61478	7.6384	9667.74	Barton and Lin, 1955	*
14	0.00018	1.65	9.99998e-07	0.0452118	0.221642	0.701582	8.13814	6.81655	10020.9	Barton and Lin, 1955	*
15	0.00018	1.65	9.99998e-07	0.0298064	0.130602	0.304925	5.36516	2.96265	3892.77	Barton and Lin, 1955	*
16	0.000137	1.65	1.00025e-06	0.0323546	0.133864	0.472061	4.43145	3.0447	4330.03	Vanoni and Brooks, 1957	*
17	0.000137	1.65	1.00025e-06	0.0397122	0.1138	0.711172	5.43919	4.58692	4518.1	Vanoni and Brooks, 1957	*
18	0.000137	1.65	1.00025e-06	0.0363381	0.115663	0.595458	4.97705	3.84059	4201.9	Vanoni and Brooks, 1957	*
19	0.000137	1.65	1.00025e-06	0.0419425	0.121719	0.793296	5.74466	5.1166	5103.9	Vanoni and Brooks, 1957	*
20	0.000137	1.65	1.00025e-06	0.0450097	0.121437	0.913562	6.16475	5.8923	5464.45	Vanoni and Brooks, 1957	*
21	0.000137	1.65	1.00025e-06	0.0403502	0.132628	0.734205	5.52656	4.73548	5350.2	Vanoni and Brooks, 1957	*
22	0.000137	1.65	1.00025e-06	0.037515	0.135426	0.634653	5.13825	4.09339	5079.22	Vanoni and Brooks, 1957	*
23	0.00023	1.65	1.0001e-06	0.0225833	0.127737	0.136991	5.19361	1.92228	2884.42	Vanoni and Brooks, 1957	*
24	0.00023	1.65	1.0001e-06	0.0266665	0.125679	0.191008	6.13266	2.68024	3351.08	Vanoni and Brooks, 1957	*
25	0.00023	1.65	1.0001e-06	0.0403571	0.161088	0.437481	9.28117	6.13878	6500.38	Vanoni and Brooks, 1957	*
26	0.00023	1.65	1.0001e-06	0.0341775	0.171899	0.313762	7.86001	4.40275	5874.47	Vanoni and Brooks, 1957	*
27	0.00023	1.65	1.0001e-06	0.0370968	0.195292	0.369651	8.53137	5.18698	7243.94	Vanoni and Brooks, 1957	*
28	0.00023	1.65	1.0001e-06	0.036097	0.1962	0.349994	8.30144	4.91115	7081.49	Vanoni and Brooks, 1957	*
29	0.00023	1.65	1.0001e-06	0.038825	0.184288	0.404895	8.92882	5.68152	7154.24	Vanoni and Brooks, 1957	*
30	0.00023	1.65	1.0001e-06	0.0416641	0.1809	0.466277	9.58175	6.54285	7536.24	Vanoni and Brooks, 1957	*
31	0.00023	1.65	1.0001e-06	0.0406337	0.1809	0.443498	9.34477	6.22321	7349.85	Vanoni and Brooks, 1957	*
32	0.00026	1.65	1.41794e-06	0.0489968	0.215006	0.57044	8.98427	6.78559	7429.51	Vanoni and Brooks, 1957	*
33	0.00026	1.65	1.41794e-06	0.0471366	0.247115	0.527948	8.64318	6.28014	8214.85	Vanoni and Brooks, 1957	*
34	0.00026	1.65	1.41794e-06	0.0497839	0.252329	0.588914	9.1286	7.00536	8859.26	Vanoni and Brooks, 1957	*
35	0.00026	1.65	1.41794e-06	0.0503539	0.290684	0.602476	9.23311	7.16668	10322.8	Vanoni and Brooks, 1957	*
36	0.00026	1.65	1.41794e-06	0.0455541	0.244265	0.493093	8.353	5.86553	7847.5	Vanoni and Brooks, 1957	*
37	0.00026	1.65	1.41794e-06	0.0468158	0.21802	0.520786	8.58436	6.19494	7198.3	Vanoni and Brooks, 1957	*
38	0.00026	1.65	1.41794e-06	0.038229	0.200552	0.347264	7.00984	4.13084	5407.06	Vanoni and Brooks, 1957	*
39	0.000195	1.65	1e-06	0.014004	0.197656	0.062132	2.73077	0.680679	2767.97	Alexander, 1980	*
40	0.000195	1.65	1e-06	0.0139721	0.188696	0.0618498	2.72456	0.677587	2636.47	Alexander, 1980	*
41	0.000195	1.65	1e-06	0.0155502	0.193124	0.0766094	3.03227	0.839284	3003.1	Alexander, 1980	*
42	0.000195	1.65	1e-06	0.0164984	0.190897	0.0862378	3.21718	0.944767	3149.49	Alexander, 1980	*
43	0.000195	1.65	1e-06	0.016536	0.194473	0.0866315	3.22452	0.949079	3215.8	Alexander, 1980	*
44	0.000195	1.65	1e-06	0.0154443	0.184797	0.0755699	3.01163	0.827895	2854.05	Alexander, 1980	*
45	0.000195	1.65	1e-06	0.0171886	0.166478	0.0936036	3.35176	1.02546	2861.52	Alexander, 1980	*
46	0.000195	1.65	1e-06	0.0156567	0.158195	0.077663	3.05305	0.850826	2476.81	Alexander, 1980	*
47	0.000195	1.65	1e-06	0.0179076	0.143509	0.101599	3.49197	1.11305	2569.9	Alexander, 1980	*
48	0.000195	1.65	1e-06	0.0178263	0.146537	0.100678	3.47611	1.10296	2612.19	Alexander, 1980	*
49	0.000195	1.65	1e-06	0.0184456	0.145183	0.107794	3.59687	1.18093	2677.98	Alexander, 1980	*
50	0.000195	1.65	1e-06	0.0207166	0.148936	0.135972	4.03972	1.48962	3085.43	Alexander, 1980	*
51	0.000195	1.65	1e-06	0.0198396	0.141525	0.124703	3.8687	1.36617	2807.79	Alexander, 1980	*
52	0.000195	1.65	1e-06	0.030577	0.141854	0.296212	5.9625	3.24511	4337.47	Alexander, 1980	*
53	0.000195	1.65	1e-06	0.0208111	0.137003	0.137216	4.05816	1.50325	2851.18	Alexander, 1980	*
54	0.000195	1.65	1e-06	0.0216817	0.139246	0.148936	4.22791	1.63164	3019.07	Alexander, 1980	*
55	0.000195	1.65	1e-06	0.0219799	0.145521	0.153061	4.28607	1.67684	3198.52	Alexander, 1980	*
56	0.000195	1.65	1e-06	0.0222822	0.138923	0.1573	4.34501	1.72328	3095.5	Alexander, 1980	*
57	0.000195	1.65	1e-06	0.0197494	0.1314	0.123572	3.85112	1.35378	2595.07	Alexander, 1980	*
58	0.000195	1.65	1e-06	0.0220802	0.166478	0.154461	4.30563	1.69218	3675.86	Alexander, 1980	*
59	0.000195	1.65	1e-06	0.0222315	0.177239	0.156585	4.33513	1.71545	3940.28	Alexander, 1980	*
60	0.000195	1.65	1e-06	0.0231088	0.160041	0.169188	4.50621	1.85351	3698.34	Alexander, 1980	*
61	0.000195	1.65	1e-06	0.0244623	0.164177	0.189586	4.77013	2.07698	4016.14	Alexander, 1980	*
62	0.000195	1.65	1e-06	0.0241304	0.157829	0.184477	4.70542	2.02102	3808.46	Alexander, 1980	*
63	0.000195	1.65	1e-06	0.0256019	0.158563	0.207663	4.99236	2.27502	4059.5	Alexander, 1980	*
64	0.000195	1.65	1e-06	0.0269783	0.163797	0.23059	5.26075	2.5262	4418.94	Alexander, 1980	*
65	0.000195	1.65	1e-06	0.0281709	0.158195	0.251428	5.4933	2.75448	4456.48	Alexander, 1980	*
66	0.000195	1.65	1e-06	0.026311	0.144847	0.219325	5.13063	2.40278	3811.06	Alexander, 1980	*
67	0.000195	1.65	1e-06	0.032664	0.154568	0.338027	6.36946	3.70321	5048.78	Alexander, 1980	*
68	0.000195	1.65	1e-06	0.0324416	0.158563	0.33344	6.3261	3.65296	5144.02	Alexander, 1980	*
69	0.000195	1.65	1e-06	0.0312812	0.158195	0.310013	6.09981	3.3963	4948.52	Alexander, 1980	*
70	0.000195	1.65	1e-06	0.0309976	0.154568	0.304417	6.04451	3.335	4791.21	Alexander, 1980	*
71	0.000195	1.65	1e-06	0.0307866	0.150324	0.300287	6.00336	3.28975	4627.96	Alexander, 1980	*
72	0.000195	1.65	1e-06	0.0293493	0.141525	0.272903	5.72309	2.98975	4153.66	Alexander, 1980	*
73	0.000195	1.65	1e-06	0.0286234	0.138923	0.259571	5.58155	2.84369	3976.45	Alexander, 1980	*
74	0.000195	1.65	1e-06	0.0252546	0.132625	0.202066	4.92462	2.2137	3349.37	Alexander, 1980	*
75	0.000195	1.65	1e-06	0.0249119	0.128387	0.19662	4.85781	2.15404	3198.35	Alexander, 1980	*
76	0.000195	1.65	1e-06	0.02203	0.132011	0.153759	4.29583	1.68449	2908.2	Alexander, 1980	*
77	0.000195	1.65	1e-06	0.0219299	0.127497	0.152365	4.27632	1.66922	2795.98	Alexander, 1980	*
78	0.000195	1.65	1e-06	0.0245181	0.116468	0.190452	4.78101	2.08647	2855.56	Alexander, 1980	*
79	0.000195	1.65	1e-06	0.0229516	0.11566	0.166892	4.47554	1.82837	2654.58	Alexander, 1980	*
80	0.000195	1.65	1e-06	0.0256019	0.116738	0.207663	4.99236	2.27502	2988.72	Alexander, 1980	*
81	0.000195	1.65	1e-06	0.0281709	0.126026	0.251428	5.4933	2.75448	3550.26	Alexander, 1980	*
82	0.000195	1.65	1e-06	0.0288853	0.129584	0.264342	5.63261	2.89596	3743.05	Alexander, 1980	*
83	0.000195	1.65	1e-06	0.0290832	0.134796	0.267977	5.67121	2.93579	3920.3	Alexander, 1980	*
84	0.000195	1.65	1e-06	0.0295505	0.136053	0.276657	5.76232	3.03087	4020.41	Alexander, 1980	*
85	0.000195	1.65	1e-06	0.0301622	0.138923	0.288229	5.8816	3.15766	4190.21	Alexander, 1980	*
86	0.000195	1.65	1e-06	0.0314239	0.138923	0.312848	6.12764	3.42736	4365.5	Alexander, 1980	*
87	0.000195	1.65	1e-06	0.030577	0.137003	0.296212	5.9625	3.24511	4189.13	Alexander, 1980	*
88	0.000195	1.65	1e-06	0.0294162	0.126612	0.274148	5.73614	3.00339	3724.44	Alexander, 1980	*
89	0.000195	1.65	1e-06	0.0301622	0.125443	0.288229	5.8816	3.15766	3783.62	Alexander, 1980	*
90	0.000195	1.65	1e-06	0.0310683	0.135423	0.305806	6.05829	3.35022	4207.35	Alexander, 1980	*
91	0.000195	1.65	1e-06	0.0314956	0.1314	0.314276	6.14162	3.44301	4138.51	Alexander, 1980	*
92	0.000195	1.65	1e-06	0.0325156	0.132318	0.334963	6.34052	3.66964	4302.38	Alexander, 1980	*
93	0.000195	1.65	1e-06	0.033953	0.12809	0.365232	6.62082	4.00125	4349.01	Alexander, 1980	*
94	0.000195	1.65	1e-06	0.0345771	0.130186	0.378782	6.74251	4.14969	4501.45	Alexander, 1980	*
95	0.000195	1.65	1e-06	0.0371902	0.123136	0.438197	7.25206	4.80061	4579.45	Alexander, 1980	*
96	0.000195	1.65	1e-06	0.0389227	0.134172	0.479976	7.58991	5.25831	5222.34	Alexander, 1980	*
97	0.000195	1.65	1e-06	0.0374451	0.135109	0.444224	7.30176	4.86663	5059.16	Alexander, 1980	*
98	0.000195	1.65	1e-06	0.0391004	0.145859	0.484368	7.62455	5.30643	5703.11	Alexander, 1980	*
99	0.000195	1.65	1e-06	0.0392788	0.149628	0.488799	7.65935	5.35497	5877.21	Alexander, 1980	*
100	0.000195	1.65	1e-06	0.0401834	0.151374	0.51157	7.83573	5.60444	6082.7	Alexander, 1980	*
101	0.000195	1.65	1e-06	0.0392788	0.154927	0.488799	7.65935	5.35497	6085.32	Alexander, 1980	*
102	0.000195	1.65	1e-06	0.0389227	0.141525	0.479976	7.58991	5.25831	5508.54	Alexander, 1980	*
103	0.000195	1.65	1e-06	0.0359416	0.149628	0.409267	7.00858	4.48367	5377.86	Alexander, 1980	*
104	0.000195	1.65	1e-06	0.0341857	0.143842	0.370255	6.66618	4.05628	4917.33	Alexander, 1980	*
105	0.000195	1.65	1e-06	0.034973	0.149628	0.387505	6.8197	4.24526	5232.93	Alexander, 1980	*
106	0.000195	1.65	1e-06	0.0342636	0.161159	0.371945	6.68138	4.0748	5521.86	Alexander, 1980	*
107	0.000195	1.65	1e-06	0.0348141	0.171178	0.383992	6.78872	4.20677	5959.37	Alexander, 1980	*
108	0.000195	1.65	1e-06	0.0362704	0.180141	0.41679	7.0727	4.56609	6533.75	Alexander, 1980	*
109	0.000195	1.65	1e-06	0.0392788	0.182666	0.488799	7.65935	5.35497	7174.87	Alexander, 1980	*
110	0.000195	1.65	1e-06	0.0402749	0.186519	0.513904	7.85358	5.63001	7512.03	Alexander, 1980	*
111	0.000195	1.65	1e-06	0.0383947	0.237963	0.467041	7.48694	5.1166	9136.48	Alexander, 1980	*
112	0.000195	1.65	1e-06	0.0450282	0.381974	0.642363	8.78046	7.03733	17199.5	Alexander, 1980	*
113	0.000195	1.65	1e-06	0.0451308	0.345711	0.645296	8.80048	7.06945	15602.1	Alexander, 1980	*
114	0.000195	1.65	1e-06	0.0440146	0.31654	0.61377	8.58282	6.72408	13932.3	Alexander, 1980	*
115	0.000195	1.65	1e-06	0.0425368	0.318011	0.573248	8.29465	6.28014	13527.1	Alexander, 1980	*
116	0.000195	1.65	1e-06	0.0423436	0.300791	0.568051	8.25697	6.22321	12736.5	Alexander, 1980	*
117	0.000195	1.65	1e-06	0.0454401	0.290504	0.654171	8.86079	7.16668	13200.5	Alexander, 1980	*
118	0.000195	1.65	1e-06	0.0425368	0.263535	0.573248	8.29465	6.28014	11209.9	Alexander, 1980	*
119	0.000195	1.65	1e-06	0.0425368	0.256299	0.573248	8.29465	6.28014	10902.1	Alexander, 1980	*
120	0.000195	1.65	1e-06	0.0449258	0.209457	0.639445	8.76049	7.00536	9410	Alexander, 1980	*
121	0.000195	1.65	1e-06	0.0422473	0.199037	0.565471	8.2382	6.19494	8408.74	Alexander, 1980	*
122	0.000195	1.65	1e-06	0.0409219	0.199963	0.530548	7.97975	5.81235	8182.84	Alexander, 1980	*
123	0.000195	1.65	1e-06	0.0441149	0.178892	0.616571	8.60237	6.75475	7891.75	Alexander, 1980	*
124	0.000195	1.65	1e-06	0.0428283	0.176829	0.581132	8.3515	6.36651	7573.24	Alexander, 1980	*
125	0.000195	1.65	1e-06	0.040551	0.160785	0.520973	7.90741	5.70745	6519.97	Alexander, 1980	*
126	0.000195	1.65	1e-06	0.0392788	0.160785	0.488799	7.65935	5.35497	6315.43	Alexander, 1980	*
127	0.000195	1.46955	2.53e-06	0.0171547	0.363428	0.104684	1.3222	0.427797	2464.23	Alexander, 1980	*
128	0.000195	1.46955	2.53e-06	0.0196209	0.346148	0.136947	1.51229	0.559641	2684.49	Alexander, 1980	*
129	0.000195	1.46955	2.53e-06	0.0203953	0.262038	0.147969	1.57197	0.604686	2112.39	Alexander, 1980	*
130	0.000195	1.46955	2.53e-06	0.0221373	0.275759	0.174325	1.70623	0.712391	2412.87	Alexander, 1980	*
131	0.000195	1.46955	2.53e-06	0.0241928	0.285523	0.208201	1.86466	0.850826	2730.27	Alexander, 1980	*
132	0.000195	1.46955	2.53e-06	0.0250903	0.265095	0.223936	1.93384	0.91513	2628.99	Alexander, 1980	*
133	0.000195	1.46955	2.53e-06	0.0241928	0.234971	0.208201	1.86466	0.850826	2246.88	Alexander, 1980	*
134	0.000195	1.46955	2.53e-06	0.0252623	0.239928	0.227016	1.94709	0.927717	2395.7	Alexander, 1980	*
135	0.000195	1.46955	2.53e-06	0.0261994	0.229051	0.244172	2.01932	0.997824	2371.94	Alexander, 1980	*
136	0.000195	1.46955	2.53e-06	0.0266203	0.22328	0.25208	2.05176	1.03014	2349.32	Alexander, 1980	*
137	0.000195	1.46955	2.53e-06	0.0260804	0.213157	0.241958	2.01015	0.988777	2197.32	Alexander, 1980	*
138	0.000195	1.46955	2.53e-06	0.0261398	0.198367	0.243062	2.01473	0.993289	2049.51	Alexander, 1980	*
139	0.000195	1.46955	2.53e-06	0.0276079	0.180369	0.271131	2.12788	1.10799	1968.23	Alexander, 1980	*
140	0.000195	1.46955	2.53e-06	0.0281154	0.210699	0.28119	2.167	1.1491	2341.46	Alexander, 1980	*
141	0.000195	1.46955	2.53e-06	0.0277971	0.225885	0.274859	2.14246	1.12323	2481.79	Alexander, 1980	*
142	0.000195	1.46955	2.53e-06	0.0294922	0.214646	0.309404	2.27312	1.2644	2502.13	Alexander, 1980	*
143	0.000195	1.46955	2.53e-06	0.0296268	0.206825	0.312236	2.28349	1.27597	2421.96	Alexander, 1980	*
144	0.000195	1.46955	2.53e-06	0.0298298	0.199289	0.316529	2.29914	1.29352	2349.71	Alexander, 1980	*
145	0.000195	1.46955	2.53e-06	0.0295595	0.194268	0.310818	2.2783	1.27018	2269.75	Alexander, 1980	*
146	0.000195	1.46955	2.53e-06	0.0318658	0.189373	0.361212	2.45606	1.47612	2385.2	Alexander, 1980	*
147	0.000195	1.46955	2.53e-06	0.0320842	0.195625	0.36618	2.47289	1.49642	2480.81	Alexander, 1980	*
148	0.000195	1.46955	2.53e-06	0.031649	0.207305	0.356312	2.43935	1.45609	2593.28	Alexander, 1980	*
149	0.000195	1.46955	2.53e-06	0.0315769	0.211679	0.354693	2.4338	1.44947	2641.97	Alexander, 1980	*
150	0.000195	1.46955	2.53e-06	0.0294922	0.256624	0.309404	2.27312	1.2644	2991.47	Alexander, 1980	*
151	0.000195	1.46955	2.53e-06	0.0354647	0.207787	0.44741	2.73345	1.82837	2912.69	Alexander, 1980	*
152	0.000195	1.46955	2.53e-06	0.0350633	0.183322	0.437339	2.70251	1.78721	2540.66	Alexander, 1980	*
153	0.000195	1.46955	2.53e-06	0.0354647	0.171793	0.44741	2.73345	1.82837	2408.14	Alexander, 1980	*
154	0.000195	1.46955	2.53e-06	0.0392908	0.174605	0.549152	3.02834	2.24415	2711.61	Alexander, 1980	*
155	0.000195	1.46955	2.53e-06	0.0414031	0.184602	0.609785	3.19114	2.49192	3020.99	Alexander, 1980	*
156	0.000195	1.46955	2.53e-06	0.047033	0.191583	0.786895	3.62507	3.2157	3561.54	Alexander, 1980	*
157	0.000195	1.46955	2.53e-06	0.0469261	0.217654	0.783321	3.61683	3.20109	4037.02	Alexander, 1980	*
158	0.000195	1.46955	2.53e-06	0.0495614	0.22328	0.873775	3.81995	3.57074	4373.94	Alexander, 1980	*
159	0.000195	1.46955	2.53e-06	0.0569453	0.207787	1.15353	4.38907	4.71396	4676.87	Alexander, 1980	*
160	0.000105	1.65	9.99944e-07	0.0163847	0.149031	0.157956	1.72049	0.683787	2441.96	Alexander, 1980	*
161	0.000105	1.65	9.99944e-07	0.0149585	0.145951	0.131654	1.57073	0.569927	2183.34	Alexander, 1980	*
162	0.000105	1.65	9.99944e-07	0.0150268	0.139658	0.132859	1.5779	0.575143	2098.73	Alexander, 1980	*
163	0.000105	1.65	9.99944e-07	0.0160159	0.139982	0.150925	1.68177	0.653352	2242.08	Alexander, 1980	*
164	0.000105	1.65	9.99944e-07	0.0153728	0.129366	0.139049	1.61424	0.601937	1988.83	Alexander, 1980	*
165	0.000105	1.65	9.99944e-07	0.016497	0.120949	0.160129	1.73229	0.693194	1995.42	Alexander, 1980	*
166	0.000105	1.65	9.99944e-07	0.017148	0.126399	0.173016	1.80065	0.748983	2167.62	Alexander, 1980	*
167	0.000105	1.65	9.99944e-07	0.0176632	0.136456	0.183567	1.85474	0.794656	2410.37	Alexander, 1980	*
168	0.000105	1.65	9.99944e-07	0.0192155	0.136456	0.217251	2.01774	0.940475	2622.22	Alexander, 1980	*
169	0.000105	1.65	9.99944e-07	0.0194798	0.129666	0.223268	2.04549	0.966522	2526.02	Alexander, 1980	*
170	0.000105	1.65	9.99944e-07	0.019658	0.126693	0.227372	2.06421	0.984287	2490.67	Alexander, 1980	*
171	0.000105	1.65	9.99944e-07	0.0188258	0.128469	0.208528	1.97682	0.902714	2418.66	Alexander, 1980	*
172	0.000105	1.65	9.99944e-07	0.0183602	0.123788	0.198341	1.92793	0.858611	2272.89	Alexander, 1980	*
173	0.000105	1.65	9.99944e-07	0.018783	0.119277	0.20758	1.97232	0.898609	2240.51	Alexander, 1980	*
174	0.000105	1.65	9.99944e-07	0.0190413	0.120949	0.21333	1.99945	0.923498	2303.16	Alexander, 1980	*
175	0.000105	1.65	9.99944e-07	0.0194798	0.104746	0.223268	2.04549	0.966522	2040.55	Alexander, 1980	*
176	0.000105	1.65	9.99944e-07	0.0199738	0.109467	0.234736	2.09737	1.01617	2186.59	Alexander, 1980	*
177	0.000105	1.65	9.99944e-07	0.0209043	0.102345	0.257116	2.19508	1.11305	2139.56	Alexander, 1980	*
178	0.000105	1.65	9.99944e-07	0.0213857	0.10499	0.269095	2.24563	1.16491	2245.41	Alexander, 1980	*
179	0.000105	1.65	9.99944e-07	0.0211919	0.099766	0.264238	2.22527	1.14388	2114.35	Alexander, 1980	*
180	0.000105	1.65	9.99944e-07	0.0212402	0.0926283	0.265444	2.23034	1.1491	1967.55	Alexander, 1980	*
181	0.000105	1.65	9.99944e-07	0.0228454	0.0990742	0.307082	2.3989	1.32935	2263.51	Alexander, 1980	*
182	0.000105	1.65	9.99944e-07	0.0226382	0.133018	0.301539	2.37715	1.30535	3011.46	Alexander, 1980	*
183	0.000105	1.65	9.99944e-07	0.0230019	0.123501	0.311304	2.41533	1.34763	2840.91	Alexander, 1980	*
184	0.000105	1.65	9.99944e-07	0.0248532	0.106461	0.36343	2.60973	1.57328	2646.05	Alexander, 1980	*
185	0.000105	1.65	9.99944e-07	0.0258339	0.0999976	0.39268	2.71271	1.6999	2583.48	Alexander, 1980	*
186	0.000105	1.65	9.99944e-07	0.02661	0.0943634	0.416626	2.7942	1.80356	2511.15	Alexander, 1980	*
187	0.000105	1.65	9.99944e-07	0.0275972	0.0939266	0.448112	2.89786	1.93986	2592.25	Alexander, 1980	*
188	0.000105	1.65	9.99944e-07	0.0272227	0.108456	0.436035	2.85855	1.88758	2952.62	Alexander, 1980	*
189	0.000105	1.65	9.99944e-07	0.024516	0.119277	0.353636	2.57432	1.53088	2924.36	Alexander, 1980	*
190	0.000105	1.65	9.99944e-07	0.0288828	0.106956	0.490836	3.03286	2.12482	3089.37	Alexander, 1980	*
191	0.000105	1.65	9.99944e-07	0.0298862	0.0842243	0.525533	3.13823	2.27502	2517.29	Alexander, 1980	*
192	0.000105	1.65	9.99944e-07	0.0305745	0.0941447	0.550016	3.2105	2.381	2878.59	Alexander, 1980	*
193	0.000105	1.65	9.99944e-07	0.0314929	0.0943634	0.583557	3.30694	2.5262	2971.94	Alexander, 1980	*
194	0.000105	1.65	9.99944e-07	0.0312785	0.0909251	0.575639	3.28443	2.49192	2844.16	Alexander, 1980	*
195	0.000105	1.65	9.99944e-07	0.0334134	0.0948021	0.656898	3.5086	2.84369	3167.84	Alexander, 1980	*
196	0.000105	1.65	9.99944e-07	0.0333374	0.098159	0.653914	3.50062	2.83078	3272.55	Alexander, 1980	*
197	0.000105	1.65	9.99944e-07	0.0318534	0.0993043	0.596994	3.3448	2.58437	3163.36	Alexander, 1980	*
198	0.000105	1.65	9.99944e-07	0.032587	0.101164	0.624806	3.42182	2.70477	3296.82	Alexander, 1980	*
199	0.000105	1.65	9.99944e-07	0.0317087	0.106461	0.591581	3.3296	2.56094	3375.94	Alexander, 1980	*
200	0.000105	1.65	9.99944e-07	0.0321448	0.109213	0.607967	3.3754	2.63187	3510.83	Alexander, 1980	*
201	0.000105	1.65	9.99944e-07	0.0341828	0.101871	0.687499	3.58939	2.97617	3482.43	Alexander, 1980	*
202	0.000105	1.65	9.99944e-07	0.0351295	0.102582	0.72611	3.68881	3.14331	3603.87	Alexander, 1980	*
203	0.000105	1.65	9.99944e-07	0.0373568	0.0990742	0.8211	3.92268	3.55452	3701.3	Alexander, 1980	*
204	0.000105	1.65	9.99944e-07	0.0390081	0.0907145	0.895299	4.09608	3.87573	3538.8	Alexander, 1980	*
205	0.000105	1.65	9.99944e-07	0.0390971	0.101871	0.899386	4.10542	3.89342	3983.08	Alexander, 1980	*
206	0.000105	1.65	9.99944e-07	0.0373568	0.10282	0.8211	3.92268	3.55452	3841.26	Alexander, 1980	*
207	0.000105	1.65	9.99944e-07	0.038217	0.104262	0.859351	4.01301	3.72011	3984.79	Alexander, 1980	*
208	0.000105	1.65	9.99944e-07	0.0356127	0.105234	0.746223	3.73955	3.23038	3747.87	Alexander, 1980	*
209	0.000105	1.65	9.99944e-07	0.0381301	0.124652	0.855448	4.00389	3.70321	4753.27	Alexander, 1980	*
210	0.000105	1.65	9.99944e-07	0.0381301	0.117902	0.855448	4.00389	3.70321	4495.86	Alexander, 1980	*
211	0.000105	1.65	9.99944e-07	0.0399974	0.119832	0.941285	4.19996	4.0748	4793.24	Alexander, 1980	*
212	0.000105	1.65	9.99944e-07	0.0412928	0.124363	1.00324	4.33599	4.34302	5135.6	Alexander, 1980	*
213	0.000105	1.65	9.99944e-07	0.0414812	0.131179	1.01242	4.35577	4.38274	5441.78	Alexander, 1980	*
214	0.000105	1.65	9.99944e-07	0.0442117	0.121794	1.15009	4.64249	4.97871	5385.01	Alexander, 1980	*
215	0.000105	1.65	9.99944e-07	0.0436119	0.117356	1.1191	4.5795	4.84453	5118.41	Alexander, 1980	*
216	0.000105	1.65	9.99944e-07	0.0471218	0.117902	1.30648	4.94807	5.6557	5556.06	Alexander, 1980	*
217	0.000105	1.65	9.99944e-07	0.0391862	0.116003	0.90349	4.11478	3.91118	4545.96	Alexander, 1980	*
218	0.000105	1.65	9.99944e-07	0.0411989	0.119832	0.998687	4.32613	4.32329	4937.23	Alexander, 1980	*
219	0.000105	1.65	9.99944e-07	0.0375272	0.109721	0.828611	3.94058	3.58703	4117.75	Alexander, 1980	*
220	0.000105	1.65	9.99944e-07	0.0443125	0.128767	1.15534	4.65307	5.00143	5706.3	Alexander, 1980	*
221	0.000105	1.65	9.99944e-07	0.0465885	0.145951	1.27707	4.89206	5.5284	6800.03	Alexander, 1980	*
222	0.000105	1.65	9.99944e-07	0.0525633	0.168919	1.62563	5.51946	7.03733	8879.45	Alexander, 1980	*
223	0.000105	1.65	9.99944e-07	0.0428247	0.118725	1.07906	4.49684	4.67123	5084.66	Alexander, 1980	*
224	0.000105	1.65	9.99944e-07	0.0389194	0.111259	0.891233	4.08677	3.85812	4330.37	Alexander, 1980	*
225	0.000105	1.65	9.99944e-07	0.0434137	0.147654	1.10895	4.5587	4.80061	6410.58	Alexander, 1980	*
226	0.000105	1.65	9.99944e-07	0.0432165	0.158664	1.0989	4.53799	4.7571	6857.27	Alexander, 1980	*
227	0.000105	1.65	9.99944e-07	0.0472293	0.178177	1.31244	4.95935	5.68152	8415.63	Alexander, 1980	*
228	0.000105	1.65	9.99944e-07	0.0453329	0.188816	1.20916	4.76022	5.23443	8560.03	Alexander, 1980	*
229	0.000115	1.5879	8e-06	0.0234	0.533	0.305662	0.336375	0.3362	1558	Grazer, 1981	*
230	2.05e-05	1.6768	6e-07	0.0142	0.092	0.597961	0.485167	0.4856	2179.4	Grazer, 1981	*
231	2.05e-05	1.3431	3e-06	0.0136	0.181	0.684773	0.0929333	0.0931	822.1	Grazer, 1981	*
232	2.05e-05	1.2534	5.2e-06	0.0146	0.279	0.845655	0.0575577	0.0575	782.3	Grazer, 1981	*
233	2.05e-05	1.1721	1.05e-05	0.0157	0.446	1.04571	0.0306524	0.0306	666.1	Grazer, 1981	*
234	0.000115	1.6714	6.3e-07	0.0171	0.124	0.155076	3.12143	3.121	3365.3	Grazer, 1981	*
235	0.00019	1.65	1e-06	0.0242826	0.1524	0.191727	4.6137	2.02019	3700.67	Guy et al., 1966	*
236	0.00019	1.65	1e-06	0.0218042	0.18288	0.154588	4.1428	1.62885	3987.56	Guy et al., 1966	*
237	0.00019	1.65	1e-06	0.0388971	0.21336	0.491958	7.39045	5.18364	8299.09	Guy et al., 1966	*
238	0.00019	1.65	1e-06	0.0422644	0.27432	0.580821	8.03023	6.11997	11594	Guy et al., 1966	*
239	0.00019	1.65	1.139e-06	0.0486944	1.55448	0.770993	8.12285	7.13237	66456.9	Guy et al., 1966	*
240	0.00019	1.65	1.053e-06	0.0533532	2.25552	0.925581	9.62688	9.26175	114282	Guy et al., 1966	*
241	0.00019	1.65	1.053e-06	0.0441197	1.64592	0.632934	7.96082	6.3334	68962.5	Guy et al., 1966	*
242	0.00019	1.65	1.028e-06	0.053314	1.58496	0.92422	9.85375	9.47303	82198.9	Guy et al., 1966	*
243	0.00019	1.65	1.028e-06	0.0568032	3.53568	1.04915	10.4986	10.7536	195368	Guy et al., 1966	*
244	0.00019	1.65	1.002e-06	0.0629671	5.39496	1.2892	11.9399	13.5569	339027	Guy et al., 1966	*
245	0.00019	1.65	1e-06	0.0285604	0.12192	0.265229	5.42647	2.79466	3482.08	Guy et al., 1966	*
246	0.00019	1.65	1e-06	0.0289348	0.18288	0.27223	5.49762	2.86842	5291.6	Guy et al., 1966	*
247	0.00019	1.65	1.053e-06	0.0432988	1.2192	0.6096	7.8127	6.09991	50132.8	Guy et al., 1966	*
248	0.00019	1.65	1.081e-06	0.0512901	2.4384	0.855384	9.01492	8.33763	115695	Guy et al., 1966	*
249	0.00019	1.65	1.081e-06	0.0444371	0.51816	0.642073	7.8104	6.25843	21300.2	Guy et al., 1966	*
250	0.00019	1.65	1.028e-06	0.0478082	1.3716	0.743187	8.83614	7.61749	63787.7	Guy et al., 1966	*
251	0.00027	1.65	1.139e-06	0.0685116	2.5908	1.07402	16.2407	16.831	155838	Guy et al., 1966	*
252	0.00027	1.65	1.081e-06	0.0687773	2.95656	1.08236	17.1784	17.8719	188108	Guy et al., 1966	*
253	0.00027	1.65	1.081e-06	0.0708524	3.38328	1.14866	17.6967	18.9666	221752	Guy et al., 1966	*
254	0.00027	1.65	1e-06	0.036901	0.36576	0.311573	9.96328	5.56138	13496.9	Guy et al., 1966	*
255	0.00027	1.65	1e-06	0.0427428	0.51816	0.418031	11.5405	7.46158	22147.6	Guy et al., 1966	*
256	0.00027	1.65	1.081e-06	0.0573923	1.8288	0.753687	14.3348	12.4448	97094.5	Guy et al., 1966	*
257	0.00027	1.65	1.053e-06	0.0483307	1.55448	0.534478	12.3925	9.0599	71347.7	Guy et al., 1966	*
258	0.00027	1.65	1.053e-06	0.0647926	2.80416	0.960582	16.6135	16.2828	172544	Guy et al., 1966	*
259	0.00027	1.65	1.139e-06	0.0531567	1.49352	0.646545	12.6008	10.1321	69702	Guy et al., 1966	*
260	0.00027	1.65	1e-06	0.0425253	0.21336	0.413789	11.4818	7.38586	9073.21	Guy et al., 1966	*
261	0.00027	1.65	1.169e-06	0.0504437	2.7432	0.582233	11.6508	8.89005	118372	Guy et al., 1966	*
262	0.00027	1.65	1e-06	0.0221309	0.12192	0.112068	5.97534	2.00034	2698.2	Guy et al., 1966	*
263	0.00028	1.65	1.139e-06	0.0598209	2.31648	0.789577	14.7057	13.0673	121663	Guy et al., 1966	*
264	0.00028	1.65	1e-06	0.0421227	0.24384	0.39149	11.7943	7.37962	10271.2	Guy et al., 1966	*
265	0.00028	1.65	1e-06	0.0366816	0.21336	0.296883	10.2708	5.59627	7826.39	Guy et al., 1966	*
266	0.00028	1.65	1e-06	0.0263552	0.18288	0.153258	7.37946	2.88892	4819.84	Guy et al., 1966	*
267	0.00028	1.65	1e-06	0.0268943	0.1524	0.159591	7.5304	3.00831	4098.69	Guy et al., 1966	*
268	0.00028	1.65	1e-06	0.0358864	0.18288	0.28415	10.0482	5.35626	6562.9	Guy et al., 1966	*
269	0.00028	1.65	1e-06	0.0429034	0.27432	0.406136	12.0129	7.6557	11769.2	Guy et al., 1966	*
270	0.00028	1.65	1e-06	0.0434023	0.36576	0.415636	12.1526	7.83478	15874.8	Guy et al., 1966	*
271	0.00028	1.65	1.109e-06	0.0463732	0.4572	0.474485	11.7083	8.06501	19118	Guy et al., 1966	*
272	0.00028	1.65	1.202e-06	0.0595252	2.49936	0.781792	13.8661	12.2603	123773	Guy et al., 1966	*
273	0.00028	1.65	1.109e-06	0.0639285	2.37744	0.901733	16.1406	15.3271	137048	Guy et al., 1966	*
274	0.00028	1.65	1.139e-06	0.0514124	1.88976	0.58321	12.6387	9.65195	85300.4	Guy et al., 1966	*
275	0.00028	1.65	1.139e-06	0.0507127	3.56616	0.567443	12.4667	9.391	158779	Guy et al., 1966	*
276	0.00028	1.65	1.139e-06	0.051033	1.76784	0.574634	12.5454	9.51001	79208.2	Guy et al., 1966	*
277	0.00028	1.65	1.109e-06	0.0613801	2.92608	0.831273	15.4972	14.1295	161950	Guy et al., 1966	*
278	0.00028	1.65	1.081e-06	0.0647395	2.98704	0.924758	16.7688	16.1256	178890	Guy et al., 1966	*
279	0.00028	1.65	1.053e-06	0.0534092	1.88976	0.629392	14.2019	11.267	95850.5	Guy et al., 1966	*
280	0.00028	1.65	1.169e-06	0.0444236	0.54864	0.435429	10.6404	7.02127	20849.1	Guy et al., 1966	*
281	0.00047	1.65	1.235e-06	0.03069	2.49936	0.123807	11.6796	4.1096	62109.7	Guy et al., 1966	*
282	0.00047	1.65	1.235e-06	0.0437317	1.88976	0.251386	16.6428	8.34445	66916.9	Guy et al., 1966	*
283	0.00047	1.65	1.271e-06	0.0829451	2.22504	0.904338	30.6721	29.1681	145206	Guy et al., 1966	*
284	0.00047	1.65	1.202e-06	0.0661445	1.70688	0.575091	25.8635	19.6135	93927.4	Guy et al., 1966	*
285	0.00047	1.65	1.109e-06	0.0604227	1.61544	0.479898	25.6074	17.7395	88015.5	Guy et al., 1966	*
286	0.00047	1.65	1.081e-06	0.0632868	1.76784	0.526473	27.516	19.9652	103498	Guy et al., 1966	*
287	0.00047	1.65	1.081e-06	0.0812534	1.9812	0.867825	35.3276	32.9101	148917	Guy et al., 1966	*
288	0.00047	1.65	1.028e-06	0.0816169	1.79832	0.875607	37.3151	34.9172	142776	Guy et al., 1966	*
289	0.00047	1.65	1.002e-06	0.0806995	1.61544	0.856034	37.8531	35.0225	130105	Guy et al., 1966	*
290	0.00047	1.65	1.002e-06	0.0820827	1.55448	0.88563	38.5019	36.2333	127341	Guy et al., 1966	*
291	0.00047	1.65	1.002e-06	0.0791847	1.64592	0.824198	37.1425	33.72	130072	Guy et al., 1966	*
292	0.00047	1.65	1.002e-06	0.0636331	1.64592	0.53225	29.8479	21.7757	104526	Guy et al., 1966	*
293	0.00047	1.65	1.002e-06	0.0646425	1.6764	0.549269	30.3213	22.4719	108150	Guy et al., 1966	*
294	0.00047	1.65	1.002e-06	0.0624809	1.34112	0.513149	29.3074	20.9942	83627.1	Guy et al., 1966	*
295	0.00047	1.65	1.002e-06	0.0618387	1.73736	0.502655	29.0062	20.5648	107222	Guy et al., 1966	*
296	0.00047	1.65	1.028e-06	0.0621907	1.55448	0.508393	28.4335	20.2735	94041	Guy et al., 1966	*
297	0.00047	1.65	1.002e-06	0.083001	2.25552	0.905557	38.9326	37.0485	186837	Guy et al., 1966	*
298	0.00047	1.65	8.9e-07	0.0688903	1.24968	0.623828	36.3802	28.7341	96731.2	Guy et al., 1966	*
299	0.00047	1.65	1.109e-06	0.0737696	1.76784	0.715327	31.264	26.4421	117595	Guy et al., 1966	*
300	0.00047	1.65	1e-06	0.0331084	0.36576	0.144087	15.5609	5.90675	12109.7	Guy et al., 1966	*
301	0.00047	1.65	1e-06	0.0323316	0.3048	0.137406	15.1959	5.63285	9854.68	Guy et al., 1966	*
302	0.00047	1.65	1e-06	0.0321182	0.27432	0.135598	15.0956	5.55873	8810.67	Guy et al., 1966	*
303	0.00047	1.65	1e-06	0.0329273	0.3048	0.142515	15.4758	5.8423	10036.2	Guy et al., 1966	*
304	0.00047	1.65	1e-06	0.0341487	0.48768	0.153284	16.0499	6.28378	16653.6	Guy et al., 1966	*
305	0.00047	1.65	1e-06	0.0308358	0.48768	0.124986	14.4928	5.1237	15038	Guy et al., 1966	*
306	0.00047	1.65	1.053e-06	0.0450452	1.31064	0.266715	20.1057	10.3835	56066.6	Guy et al., 1966	*
307	0.00047	1.65	1.028e-06	0.041175	1.40208	0.222852	18.8251	8.88682	56158.2	Guy et al., 1966	*
308	0.00047	1.65	1.139e-06	0.0365346	1.8288	0.175452	15.0757	6.31476	58660.6	Guy et al., 1966	*
309	0.00047	1.65	1.169e-06	0.0757633	1.58496	0.754513	30.4608	26.4591	102722	Guy et al., 1966	*
310	0.00047	1.65	1.028e-06	0.065618	2.62128	0.565973	30.0005	22.5697	167318	Guy et al., 1966	*
311	0.00047	1.65	1.028e-06	0.0564388	1.31064	0.418702	25.8037	16.6969	71956.2	Guy et al., 1966	*
312	0.00093	1.65	1.053e-06	0.071336	1.58496	0.338051	63.0033	36.6315	107374	Guy et al., 1966	*
313	0.00093	1.65	1.028e-06	0.0986577	1.76784	0.646585	89.2526	71.7684	169660	Guy et al., 1966	*
314	0.00093	1.65	1.053e-06	0.0773335	1.3716	0.397283	68.3003	43.0499	100732	Guy et al., 1966	*
315	0.00093	1.65	1.081e-06	0.0856079	1.79832	0.486846	73.6497	51.3886	142415	Guy et al., 1966	*
316	0.00093	1.65	1.028e-06	0.0513892	1.18872	0.175431	46.4902	19.4722	59423.5	Guy et al., 1966	*
317	0.00093	1.65	1.053e-06	0.103976	2.25552	0.718172	91.8305	77.8217	222716	Guy et al., 1966	*
318	0.00093	1.65	1.028e-06	0.107839	1.46304	0.772537	97.559	85.7487	153476	Guy et al., 1966	*
319	0.00093	1.65	1.081e-06	0.0350901	0.85344	0.0817964	30.1886	8.63395	27703.4	Guy et al., 1966	*
320	0.00093	1.65	1.002e-06	0.043039	0.79248	0.123052	39.9464	14.0127	34039.5	Guy et al., 1966	*
321	0.00093	1.65	1.028e-06	0.0590157	1.09728	0.231366	53.3897	25.6807	62993	Guy et al., 1966	*
322	0.00093	1.65	1.028e-06	0.0637693	1.0668	0.270139	57.6901	29.9844	66176.1	Guy et al., 1966	*
323	0.00093	1.65	1.053e-06	0.0334275	0.64008	0.0742286	29.5228	8.04347	20319.3	Guy et al., 1966	*
324	0.00093	1.65	1.002e-06	0.0339203	1.12776	0.0764334	31.4829	8.70395	38177.6	Guy et al., 1966	*
325	0.00093	1.65	1.028e-06	0.0492742	1.00584	0.161289	44.5769	17.9024	48212.1	Guy et al., 1966	*
326	0.00093	1.65	1.002e-06	0.0359405	0.88392	0.0858088	33.3579	9.77158	31705.1	Guy et al., 1966	*
327	0.00093	1.65	1.081e-06	0.0453891	0.88392	0.136857	39.0489	14.4458	37114.1	Guy et al., 1966	*
328	0.00093	1.65	1.081e-06	0.0707066	1.0668	0.332112	60.8299	35.0558	69777.8	Guy et al., 1966	*
329	0.00093	1.65	1.053e-06	0.0955366	2.01168	0.606323	84.3771	65.7016	182516	Guy et al., 1966	*
330	0.00093	1.65	1.028e-06	0.1042	1.92024	0.721271	94.2664	80.0582	194639	Guy et al., 1966	*
331	0.00032	1.65	7.19e-07	0.0643759	1.28016	0.8001	28.6513	25.6281	114620	Guy et al., 1966	*
332	0.00032	1.65	1.202e-06	0.0653235	1.40208	0.823826	17.3906	15.7846	76196.9	Guy et al., 1966	*
333	0.00032	1.65	1.169e-06	0.0504911	1.24968	0.492183	13.8213	9.69646	53975.8	Guy et al., 1966	*
334	0.00032	1.65	7.19e-07	0.063492	1.3716	0.778279	28.2579	24.9292	121121	Guy et al., 1966	*
335	0.00032	1.65	7.19e-07	0.0415293	1.00584	0.332971	18.4831	10.6654	58097.1	Guy et al., 1966	*
336	0.00032	1.65	1e-06	0.0432988	0.18288	0.36195	13.8556	8.33585	7918.48	Guy et al., 1966	*
337	0.00033	1.65	1e-06	0.0359072	0.27432	0.241377	11.8494	5.82161	9850.06	Guy et al., 1966	*
338	0.00033	1.65	1.002e-06	0.0610871	1.15824	0.698605	20.1185	16.8156	70612.3	Guy et al., 1966	*
339	0.00033	1.65	1e-06	0.0360651	0.24384	0.243504	11.9015	5.87292	8794.1	Guy et al., 1966	*
340	0.00033	1.65	1.002e-06	0.0705373	1.34112	0.931473	23.2308	22.4207	94410.1	Guy et al., 1966	*
341	0.00033	1.65	1.002e-06	0.0558637	0.85344	0.584242	18.3982	14.0628	47581.2	Guy et al., 1966	*
342	0.00033	1.65	1.002e-06	0.0398239	0.70104	0.296907	13.1157	7.14661	27862.4	Guy et al., 1966	*
343	0.00033	1.65	1e-06	0.0312978	0.088392	0.183384	10.3283	4.42291	2766.48	Guy et al., 1966	*
344	0.00033	1.65	1e-06	0.0267717	0.1524	0.134179	8.83466	3.23618	4080.01	Guy et al., 1966	*
345	0.00033	1.65	8.9e-07	0.0508246	1.03632	0.483594	18.8451	13.105	59180.4	Guy et al., 1966	*
346	0.00033	1.65	8.9e-07	0.0427777	1.2192	0.342585	15.8614	9.2838	58600.7	Guy et al., 1966	*
347	0.00033	1.65	8.9e-07	0.0471533	1.40208	0.416252	17.4838	11.2801	74283.9	Guy et al., 1966	*
348	0.00033	1.65	1e-06	0.0208222	0.124968	0.081168	6.87132	1.95764	2602.1	Guy et al., 1966	*
349	0.00054	1.65	1e-06	0.0219545	0.1524	0.0551445	11.8555	2.784	3345.87	Guy et al., 1966	*
350	0.00043	1.65	1.139e-06	0.0737872	0.794	0.782241	27.8564	24.6375	51437.3	Leclair, 2002	*
351	0.00043	1.65	1.169e-06	0.0641888	0.74	0.591966	23.6109	18.1661	40632.8	Leclair, 2002	*
352	0.00043	1.65	1.202e-06	0.0485222	0.824	0.338266	17.3582	10.0956	33263.1	Leclair, 2002	*
353	0.00043	1.65	1.202e-06	0.0528758	0.71	0.401691	18.9156	11.9886	31232.8	Leclair, 2002	*
354	0.00043	1.65	1.109e-06	0.0813741	0.98	0.951374	31.5517	30.7751	71908.6	Leclair, 2002	*
355	0.00043	1.65	1.169e-06	0.065325	0.76	0.613108	24.0289	18.8149	42469.6	Leclair, 2002	*
356	0.00043	1.65	1.081e-06	0.0747777	0.92	0.803383	29.745	26.661	63640.6	Leclair, 2002	*
357	0.00043	1.65	1.169e-06	0.0514655	0.92	0.38055	18.9309	11.6782	40503.2	Leclair, 2002	*
358	0.00043	1.65	1.109e-06	0.0776734	1.01	0.866808	30.1168	28.0395	70739.5	Leclair, 2002	*
359	0.00043	1.65	1.109e-06	0.0664417	0.979	0.634249	25.7619	20.5167	58653.2	Leclair, 2002	*
360	0.00043	1.65	1.109e-06	0.065325	0.945	0.613108	25.3289	19.8328	55664.6	Leclair, 2002	*
361	0.00043	1.65	1.109e-06	0.0895252	1.269	1.15152	34.7122	37.2492	102441	Leclair, 2002	*
362	0.00081	1.65	1.671e-06	0.0696142	1.18	0.369622	33.7448	20.5157	49159.1	Leclair, 2002	*
363	0.00043	1.65	1.109e-06	0.0885889	0.728	1.12755	34.3492	36.4742	58154	Leclair, 2002	*
364	0.00081	1.65	1.567e-06	0.0786149	1.33	0.47138	40.6369	27.9002	66724.8	Leclair, 2002	*
365	0.00081	1.65	1.618e-06	0.0948977	1.35	0.686869	47.5075	39.3731	79179.2	Leclair, 2002	*
366	0.00081	1.65	1.671e-06	0.101974	1.15	0.793116	49.4306	44.0215	70179.3	Leclair, 2002	*
367	0.00081	1.65	1.567e-06	0.102931	1.09	0.808081	53.2062	47.8288	71598.5	Leclair, 2002	*
368	0.00081	1.65	1.567e-06	0.133876	1.4	1.367	69.2022	80.9104	119609	Leclair, 2002	*
369	0.00081	1.65	1.567e-06	0.15723	1.5	1.88552	81.2738	111.601	150507	Leclair, 2002	*
370	0.00035	1.65	1e-06	0.0602144	2.18	0.64	21.075	16.86	131267	Gabel, 1993	*
371	0.00031	1.65	1e-06	0.05669	2.02	0.640469	17.5739	14.0643	114514	Gabel, 1993	*
372	0.00031	1.65	1e-06	0.0605556	2.08	0.730792	18.7722	16.0477	125956	Gabel, 1993	*
373	0.00033	1.65	1e-06	0.065039	2.74	0.791919	21.4629	19.0998	178207	Gabel, 1993	*
374	0.00034	1.65	1e-06	0.060927	2.09	0.67451	20.7152	17.0131	127338	Gabel, 1993	*
375	0.00039	1.65	1e-06	0.0674382	3.19	0.720435	26.3009	22.3238	215128	Gabel, 1993	*
376	0.00038	1.65	1e-06	0.0735075	3.24	0.878469	27.9328	26.1805	238164	Gabel, 1993	*
377	0.00032	1.65	1e-06	0.0522975	2.34	0.52803	16.7352	12.1607	122376	Gabel, 1993	*
378	0.00033	1.65	1e-06	0.0566207	2.18	0.600184	18.6848	14.4754	123433	Gabel, 1993	*
379	0.00041	1.65	1e-06	0.0549769	2.57	0.455432	22.5405	15.2116	141291	Gabel, 1993	*
380	0.00039	1.65	1e-06	0.0571725	2.27	0.517793	22.2973	16.0446	129782	Gabel, 1993	*
381	0.00036	1.65	1e-06	0.054177	2.28	0.503704	19.5037	13.8422	123524	Gabel, 1993	*
382	0.00037	1.65	1e-06	0.0692964	3.74	0.801802	25.6397	22.9586	259169	Gabel, 1993	*
383	0.0004	1.65	1e-06	0.0656918	3.64	0.666515	26.2767	21.4524	239118	Gabel, 1993	*
384	0.0004	1.65	1e-06	0.0644937	4.05	0.642424	25.7975	20.677	261200	Gabel, 1993	*
385	0.00036	1.65	1e-06	0.0712164	3	0.87037	25.6379	23.9185	213649	Gabel, 1993	*
386	0.00034	1.65	1e-06	0.0602307	2.51	0.65918	20.4784	16.6264	151179	Gabel, 1993	*
387	0.00033	1.65	1e-06	0.0542494	2.38	0.550964	17.9023	13.2883	129114	Gabel, 1993	*
388	0.0005	1.65	1e-06	0.0423006	1.172	0.221091	21.1503	9.94494	49576.3	Venditti et al., 2005	*
389	0.0005	1.65	1e-06	0.0404998	0.86	0.202667	20.2499	9.1162	34829.8	Venditti et al., 2005	*
390	0.0005	1.65	1e-06	0.0324137	0.954	0.129818	16.2069	5.83938	30922.7	Venditti et al., 2005	*
391	0.0005	1.65	1e-06	0.0287317	0.383	0.102	14.3659	4.58809	11004.2	Venditti et al., 2005	*
392	0.0005	1.65	1e-06	0.0287317	0.3	0.102	14.3659	4.58809	8619.51	Venditti et al., 2005	*
393	0.000399288	1.65	1.002e-06	0.0931196	3.2004	1.34166	37.1073	42.9814	297425	Stein, 1965	*
394	0.000399288	1.65	1.002e-06	0.0943952	3.41376	1.37867	37.6157	44.1671	321600	Stein, 1965	*
395	0.000399288	1.65	8.9e-07	0.0937596	2.286	1.36017	42.0641	49.0578	240825	Stein, 1965	*
396	0.000399288	1.65	1.002e-06	0.0958132	2.46888	1.4204	38.1807	45.504	236079	Stein, 1965	*
397	0.000399288	1.65	1.002e-06	0.0988817	2.16408	1.51284	39.4035	48.4653	213561	Stein, 1965	*
398	0.000399288	1.65	1.002e-06	0.0985364	2.22504	1.50229	39.2659	48.1273	218810	Stein, 1965	*
399	0.000399288	1.65	1.002e-06	0.0926528	2.46888	1.32824	36.9213	42.5516	228292	Stein, 1965	*
400	0.000399288	1.65	1.002e-06	0.0693402	1.3716	0.743928	27.6314	23.8325	94917.2	Stein, 1965	*
401	0.000399288	1.65	1.002e-06	0.0844297	2.34696	1.10294	33.6445	35.3337	197758	Stein, 1965	*
402	0.000399288	1.65	1.002e-06	0.0842879	2.80416	1.09924	33.588	35.2151	235885	Stein, 1965	*
403	0.000399288	1.65	1.002e-06	0.0825676	1.46304	1.05482	32.9024	33.7923	120559	Stein, 1965	*
404	0.000399288	1.65	8.9e-07	0.0802164	2.37744	0.995605	35.9881	35.909	214281	Stein, 1965	*
405	0.000399288	1.65	1.002e-06	0.0827123	3.26136	1.05852	32.9601	33.9109	269216	Stein, 1965	*
406	0.000399288	1.65	1.002e-06	0.0776576	3.16992	0.933102	30.9459	29.8928	245677	Stein, 1965	*
407	0.000399288	1.65	1.002e-06	0.0799176	1.88976	0.988203	31.8465	31.658	150724	Stein, 1965	*
408	0.000399288	1.65	8.9e-07	0.0644224	2.1336	0.642147	28.9023	23.1606	154440	Stein, 1965	*
409	0.000399288	1.65	1.002e-06	0.0326583	1.70688	0.165024	13.014	5.28672	55632.5	Stein, 1965	*
410	0.00135	1.65	1.028e-06	0.0377375	2.71272	0.0651718	49.558	12.6515	99583	Williams, 1967	*
411	0.00135	1.65	1.081e-06	0.0399992	1.76784	0.0732177	49.9528	13.5166	65413.7	Williams, 1967	*
412	0.00135	1.65	1.053e-06	0.0423563	1.46304	0.082101	54.3029	15.5596	58849.9	Williams, 1967	*
413	0.00135	1.65	1.081e-06	0.0436187	1.31064	0.0870681	54.473	16.0735	52884.8	Williams, 1967	*
414	0.00135	1.65	1.053e-06	0.0437945	1.09728	0.0877715	56.1469	16.6342	45636.2	Williams, 1967	*
415	0.00135	1.65	1.081e-06	0.0456256	1.0668	0.0952645	56.9793	17.5866	45026.3	Williams, 1967	*
416	0.00135	1.65	1.053e-06	0.048899	0.70104	0.109424	62.691	20.7378	32554.8	Williams, 1967	*
417	0.00135	1.65	1.109e-06	0.0525115	0.73152	0.126189	63.9229	22.7074	34637.7	Williams, 1967	*
418	0.00135	1.65	1.109e-06	0.0584701	0.6096	0.156452	71.1763	28.1531	32140.1	Williams, 1967	*
419	0.00135	1.65	1.109e-06	0.0660909	0.54864	0.199893	80.4533	35.9702	32696.2	Williams, 1967	*
420	0.00135	1.65	7.98e-07	0.0647829	0.57912	0.192059	109.595	48.0296	47013.9	Williams, 1967	*
421	0.00135	1.65	1.235e-06	0.0703312	0.39624	0.226365	76.8802	36.5779	22565.2	Williams, 1967	*
422	0.00135	1.65	1.109e-06	0.0767023	0.4572	0.269234	93.3707	48.4479	31621.5	Williams, 1967	*
423	0.00135	1.65	1.002e-06	0.081354	0.4572	0.30288	109.609	60.3226	37120.8	Williams, 1967	*
424	0.00135	1.65	8.9e-07	0.0893466	0.48768	0.365317	135.526	81.9137	48957.9	Williams, 1967	*
425	0.00135	1.65	8.9e-07	0.10219	0.48768	0.477894	155.007	107.156	55995.6	Williams, 1967	*
426	0.00135	1.65	1.002e-06	0.0456627	1.58496	0.0954192	61.5215	19.004	72229	Williams, 1967	*
427	0.00135	1.65	8.9e-07	0.0439176	1.18872	0.0882654	66.6166	19.7915	58658.1	Williams, 1967	*
428	0.00135	1.65	8.9e-07	0.0466304	1.12776	0.0995064	70.7315	22.312	59087.5	Williams, 1967	*
429	0.00135	1.65	8.9e-07	0.0515646	0.85344	0.121679	78.2159	27.2837	49446.4	Williams, 1967	*
430	0.00135	1.65	8.9e-07	0.0530745	0.88392	0.12891	80.5063	28.9049	52711.9	Williams, 1967	*
431	0.00135	1.65	1.053e-06	0.0569404	0.762	0.148373	73.0005	28.1192	41204.8	Williams, 1967	*
432	0.00135	1.65	1.028e-06	0.0622908	0.6096	0.177567	81.8022	34.4703	36938.2	Williams, 1967	*
433	0.00135	1.65	1.002e-06	0.0687895	0.67056	0.21655	92.6804	43.1287	46035.4	Williams, 1967	*
434	0.00135	1.65	1.002e-06	0.0796478	0.54864	0.290309	107.31	57.8189	43610.7	Williams, 1967	*
435	0.00014	1.47	1e-06	0.018794	0.12588	0.174954	2.63116	1.10055	2365.78	Bishop, 1977	*
436	0.00014	1.47	1e-06	0.0201203	0.120092	0.200518	2.81684	1.26136	2416.29	Bishop, 1977	*
437	0.00014	1.47	1e-06	0.0244608	0.0989939	0.296365	3.42451	1.86428	2421.47	Bishop, 1977	*
438	0.00014	1.47	1e-06	0.0252954	0.0920055	0.316935	3.54136	1.99368	2327.32	Bishop, 1977	*
439	0.00014	1.47	1e-06	0.026735	0.0913286	0.354035	3.7429	2.22706	2441.67	Bishop, 1977	*
440	0.00014	1.47	1e-06	0.0278447	0.0993567	0.384035	3.89826	2.41577	2766.56	Bishop, 1977	*
441	0.00014	1.47	1e-06	0.0316578	0.0929499	0.496417	4.43209	3.12271	2942.59	Bishop, 1977	*
442	0.00014	1.47	1e-06	0.032245	0.104568	0.515004	4.5143	3.23963	3371.79	Bishop, 1977	*
443	0.00014	1.47	1e-06	0.0331321	0.0989821	0.543729	4.63849	3.42033	3279.48	Bishop, 1977	*
444	0.00014	1.47	1e-06	0.0357885	0.105421	0.634414	5.01039	3.99078	3772.86	Bishop, 1977	*
445	0.00014	1.47	1e-06	0.0361907	0.103037	0.648754	5.0667	4.08099	3728.98	Bishop, 1977	*
446	0.00014	1.47	1e-06	0.0381679	0.114876	0.721577	5.34351	4.53908	4384.59	Bishop, 1977	*
447	0.00014	1.47	1e-06	0.0407383	0.106456	0.822037	5.70336	5.17102	4336.85	Bishop, 1977	*
448	0.00014	1.47	1e-06	0.0412396	0.115622	0.842394	5.77355	5.29908	4768.22	Bishop, 1977	*
449	0.00014	1.47	1e-06	0.0422126	0.125009	0.882611	5.90976	5.55206	5276.96	Bishop, 1977	*
450	0.00014	1.47	1e-06	0.0499902	0.124726	1.23781	6.99863	7.78647	6235.07	Bishop, 1977	*
451	0.00014	1.47	1e-06	0.0408207	0.133889	0.825366	5.7149	5.19197	5465.45	Bishop, 1977	*
452	0.00014	1.47	1e-06	0.0449251	0.150909	0.999688	6.28952	6.28854	6779.6	Bishop, 1977	*
453	0.00014	1.47	1e-06	0.0468024	0.155623	1.08498	6.55233	6.82506	7283.5	Bishop, 1977	*
454	0.00014	1.47	1e-06	0.044694	0.164139	0.989428	6.25716	6.224	7336.02	Bishop, 1977	*
455	1.5e-05	1.65	1e-06	0.0142829	0.081	0.840206	0.214243	0.196381	1156.91	Mantz, 1978	*
456	9.5e-05	1.65	1.067e-06	0.018354	0.1315	0.219072	1.63415	0.764865	2262	Baas, 1994	**
457	9.5e-05	1.65	1.064e-06	0.0201281	0.1175	0.263468	1.79715	0.922461	2222.79	Baas, 1994	**
458	9.5e-05	1.65	1.068e-06	0.0249881	0.1207	0.406059	2.22272	1.41638	2824.03	Baas, 1994	**
459	9.5e-05	1.65	1.112e-06	0.0292477	0.1158	0.556296	2.49868	1.86365	3045.76	Baas, 1994	**
460	9.5e-05	1.65	1.149e-06	0.0342886	0.114	0.764579	2.835	2.47893	3402	Baas, 1994	**
461	9.5e-05	1.65	1.17e-06	0.0387278	0.118	0.975368	3.14456	3.10559	3905.88	Baas, 1994	**
462	9.5e-05	1.65	1.099e-06	0.0436934	0.1135	1.24152	3.77695	4.20842	4512.47	Baas, 1994	**
463	9.5e-05	1.65	1.071e-06	0.0475059	0.1146	1.46764	4.21387	5.10494	5083.26	Baas, 1994	**
464	0.000238	1.65	9.99e-07	0.022202	0.14	0.127954	5.28937	1.89204	3111.39	Baas, 1999	**
465	0.000238	1.65	1.048e-06	0.0248843	0.1346	0.160739	5.65121	2.2657	3196.02	Baas, 1999	**
466	0.000238	1.65	1.064e-06	0.029172	0.1404	0.220904	6.52532	3.06693	3849.39	Baas, 1999	**
467	0.000238	1.65	1.149e-06	0.0319459	0.1399	0.264911	6.61716	3.40582	3889.67	Baas, 1999	**
468	0.000238	1.65	1.095e-06	0.0354751	0.1445	0.326676	7.71056	4.40702	4681.41	Baas, 1999	**
469	0.000238	1.65	1.104e-06	0.0366921	0.1396	0.349474	7.91007	4.67614	4639.69	Baas, 1999	**
470	0.000238	1.65	1.108e-06	0.0405087	0.1445	0.425958	8.70133	5.67896	5282.95	Baas, 1999	**
471	0.000238	1.65	1.14e-06	0.0429509	0.1396	0.478866	8.96694	6.20514	5259.6	Baas, 1999	**
472	0.000238	1.65	1.23e-06	0.0459407	0.1488	0.547854	8.88933	6.57963	5557.7	Baas, 1999	**
* For those datasets, total shear stress was calculated from the product of flow depth and bed slope, τb=ρghS.
** For those datasets, shear velocity was calculated from the Chezy-type formula of van Rijn (1984), which incorporates both a skin friction and a form drag term.
